# Supplementary material
Source: PubMed Central journal article supplement (PMC2919964)
Supplement: 1007416107_pnas.1007416107_SI.pdf [file 1007416107_pnas.1007416107_SI.pdf]

# Supporting Information

Zeng et al. 10.1073/pnas.1007416107

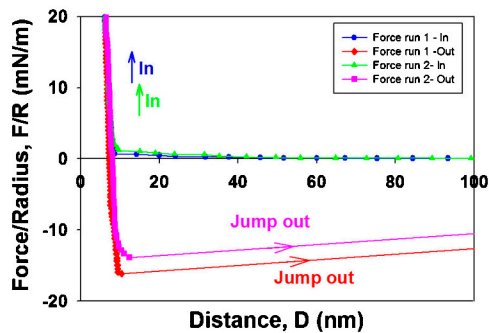

Fig. S1. Bridging adhesion in symmetric mfp-1 films on mica. Spontaneous two force runs after the 100 min contact experiments shown in Fig. 3D.

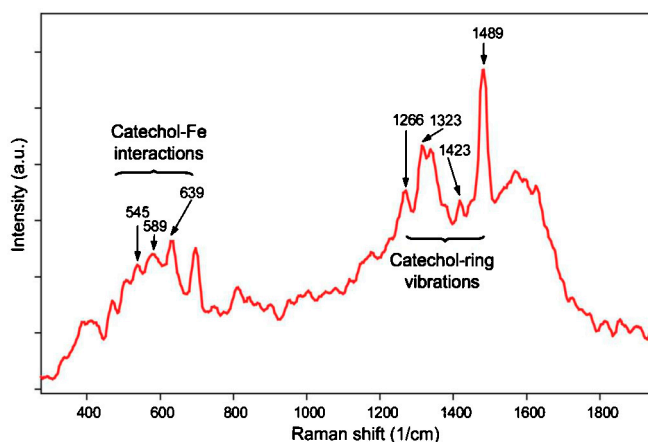

Fig. S2. Resonance Raman spectrum of a mica sandwich of mfp-1 films with  $10 \mu\text{M Fe}^{3+}$  as prepared for surface forces apparatus experiments. Near IR excitation laser wavelength was 532 nm.

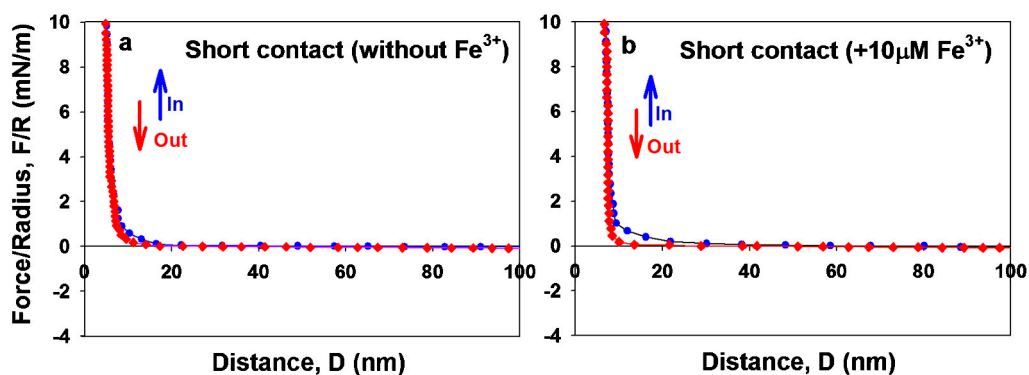

Fig. S3. Bridging adhesion in symmetric films on mica using recombinant mfp-1 without dopa: (A) short contact without  $\text{Fe}^{3+}$ , and (B) short contact with added  $10 \mu\text{M Fe}^{3+}$ .
